# Supplementary material for: Molecular Insights into the Genetic Variability of ORF Virus in a Mediterranean Region (Sardinia, Italy)
Source: MDPI journal article supplement (doi:10.3390/life11050416), 2021-05-04
Supplement: s1 [file s1]

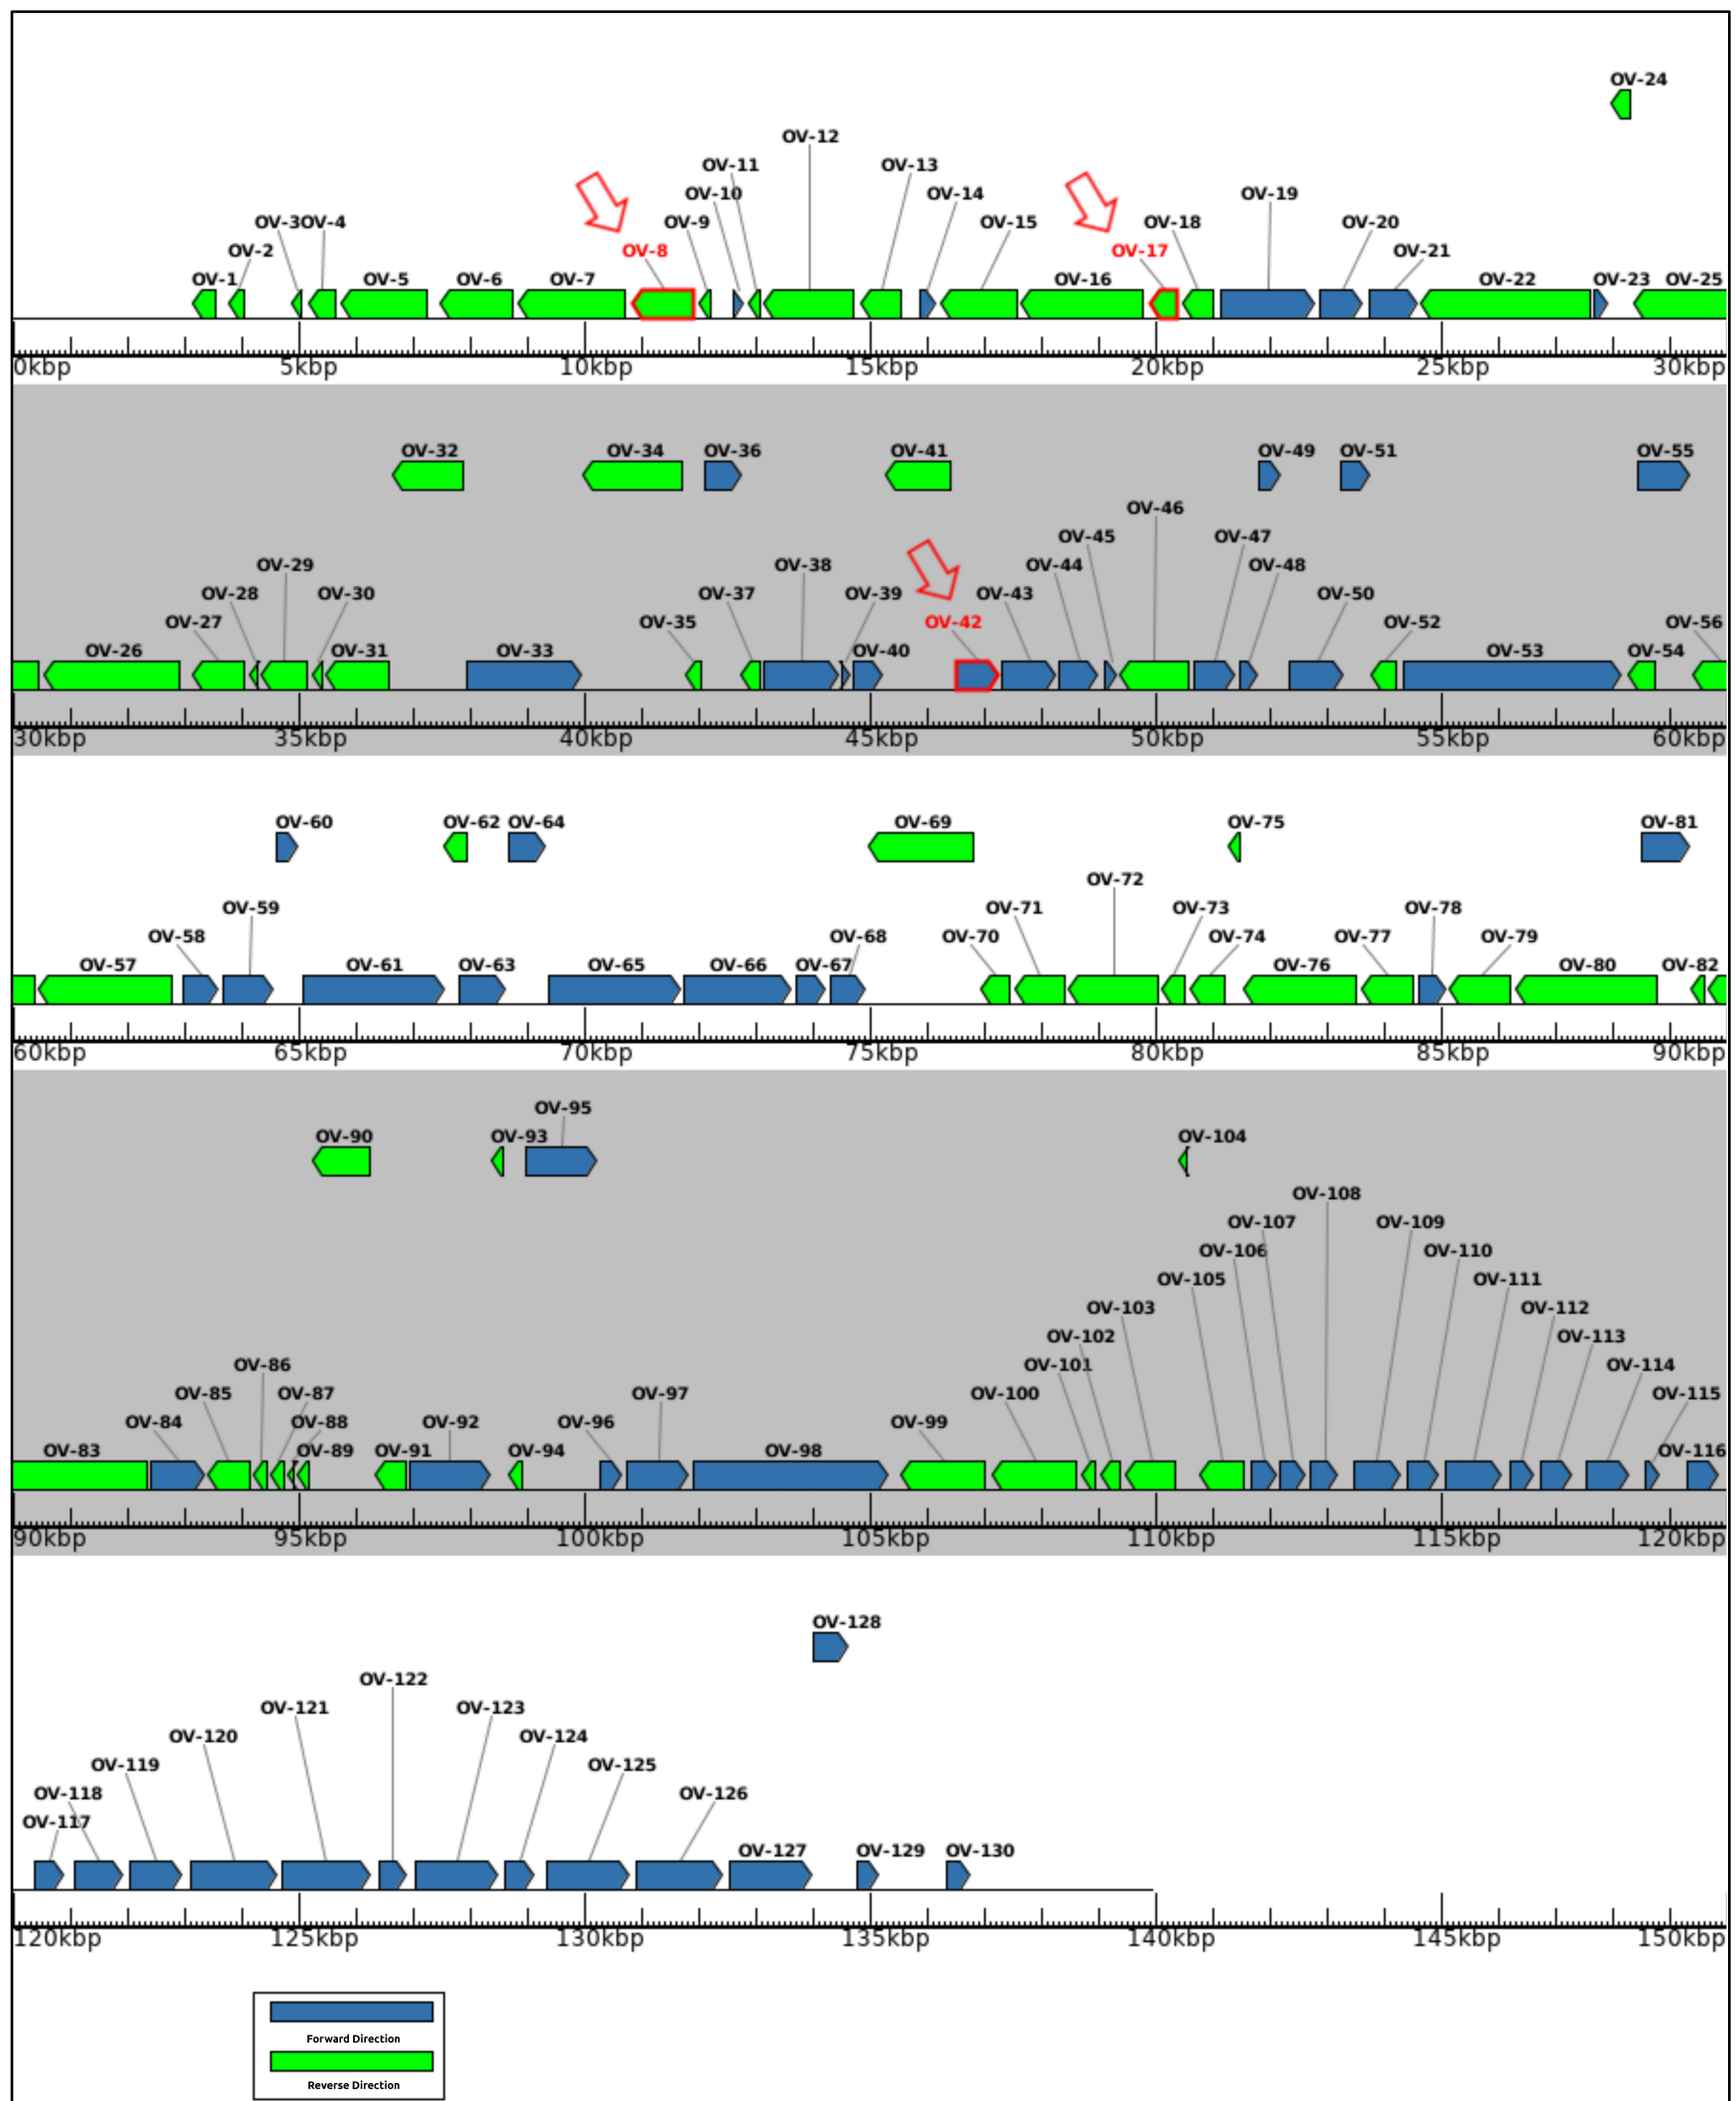

**Figure S1.** Genomic structure of ORF virus (NC\_005336) sequenced by Delhon et al. [25]. Image has been obtained by means of the Genome Image Map tool implemented in ViPR (Virus Pathogen Resources, available at <https://www.viprbrc.org/>) and subsequently edited using the software GIMP (available at <https://www.gimp.org>). The genes here analysed are outlined in red font and indicated by a red arrow. The gene B2L (ORFV011), which encodes for the major envelope protein, is indicated as OV-8, VIR (ORFV020), encoding for dsRNA-binding protein is indicated as OV-17, and O45 (ORFV045), encoding for late transcription factor VLTf-1, is indicated as OV-42.
