# Supplementary material for: Molecular Insights into the Genetic Variability of ORF Virus in a Mediterranean Region (Sardinia, Italy)
Source: MDPI journal article supplement (doi:10.3390/life11050416), 2021-05-04
Supplement: s1 [file s1]

A)

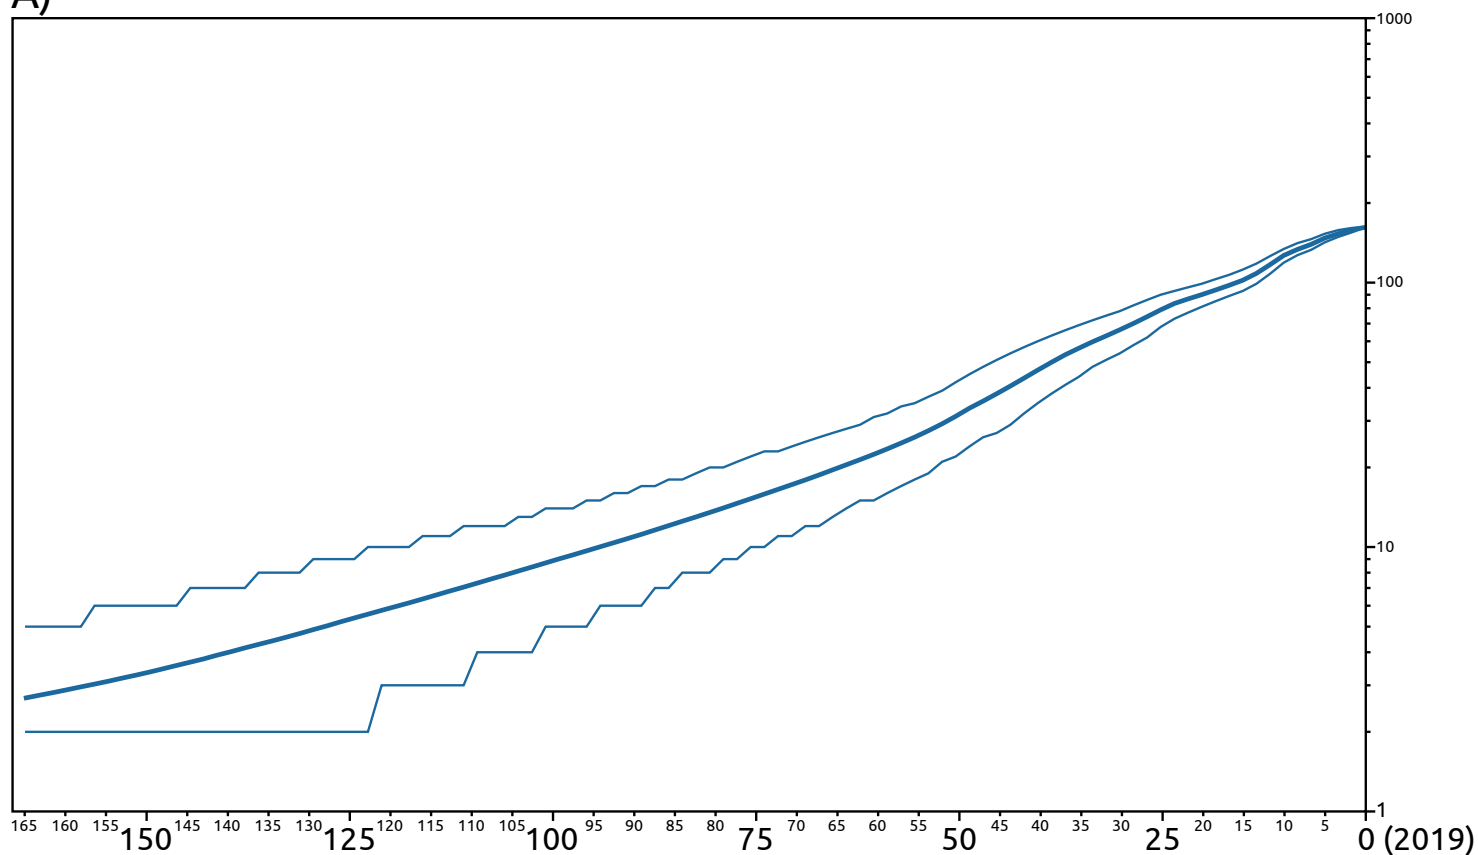

B)

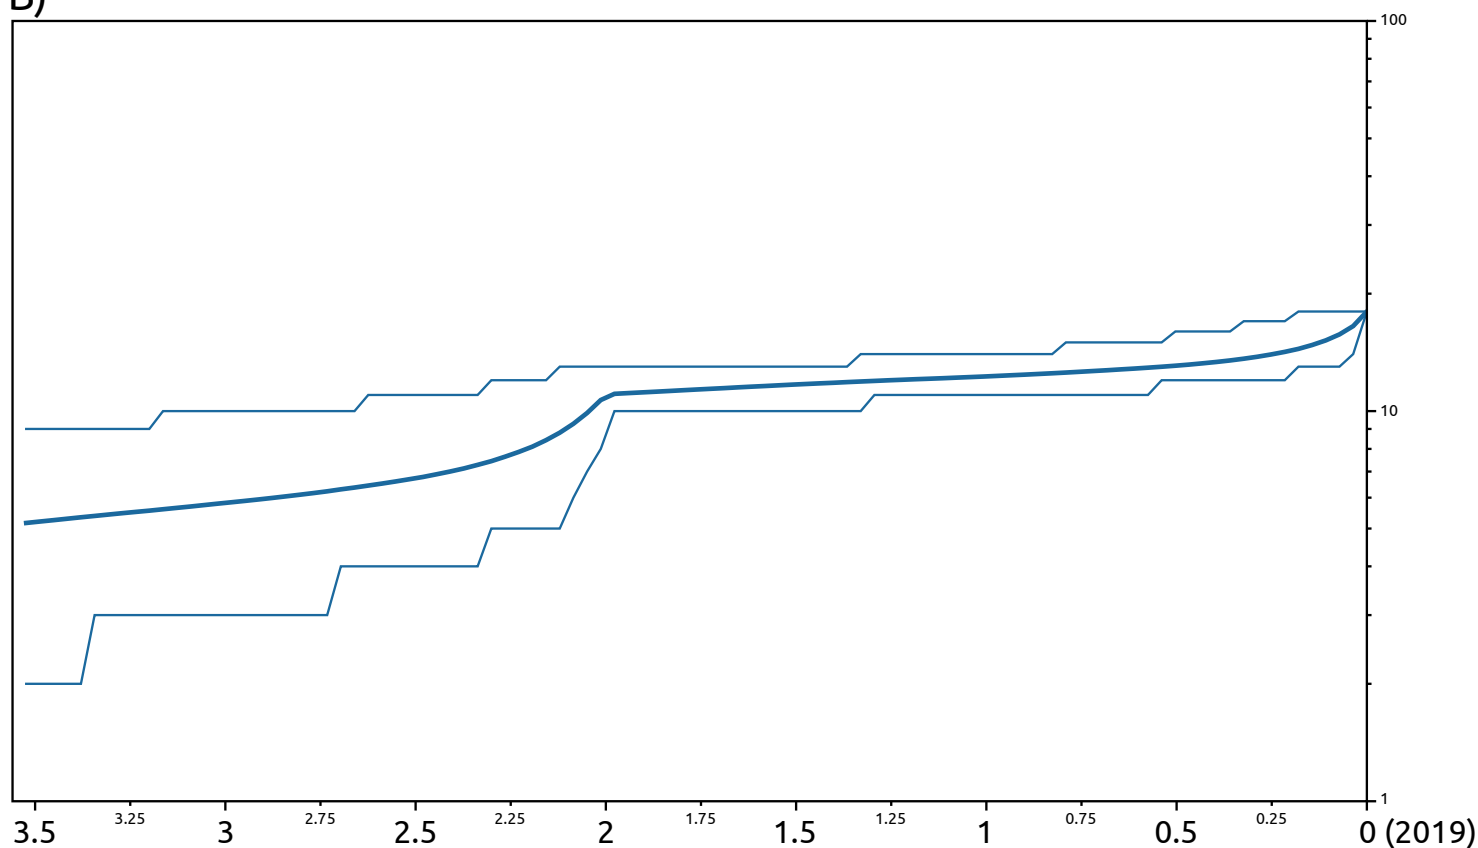

**Figure S3.** Increasing of viral lineages. Evolutionary increasing of VIR lineages. Logarithmic expansion of viral lineages (y-axis) is shown as a function of time (x-axis), with the units expressed as years. A) VIR global dataset; B) regional dataset encompassing only Sardinian sequences. The bold lines denote the median lineages estimates and the thin lines (placed above and below the median value line) demarcate the 95% highest posterior density (HPD) confidence interval.
