# Supplementary material for: Molecular Insights into the Genetic Variability of ORF Virus in a Mediterranean Region (Sardinia, Italy)
Source: MDPI journal article supplement (doi:10.3390/life11050416), 2021-05-04
Supplement: s1 [file s1]

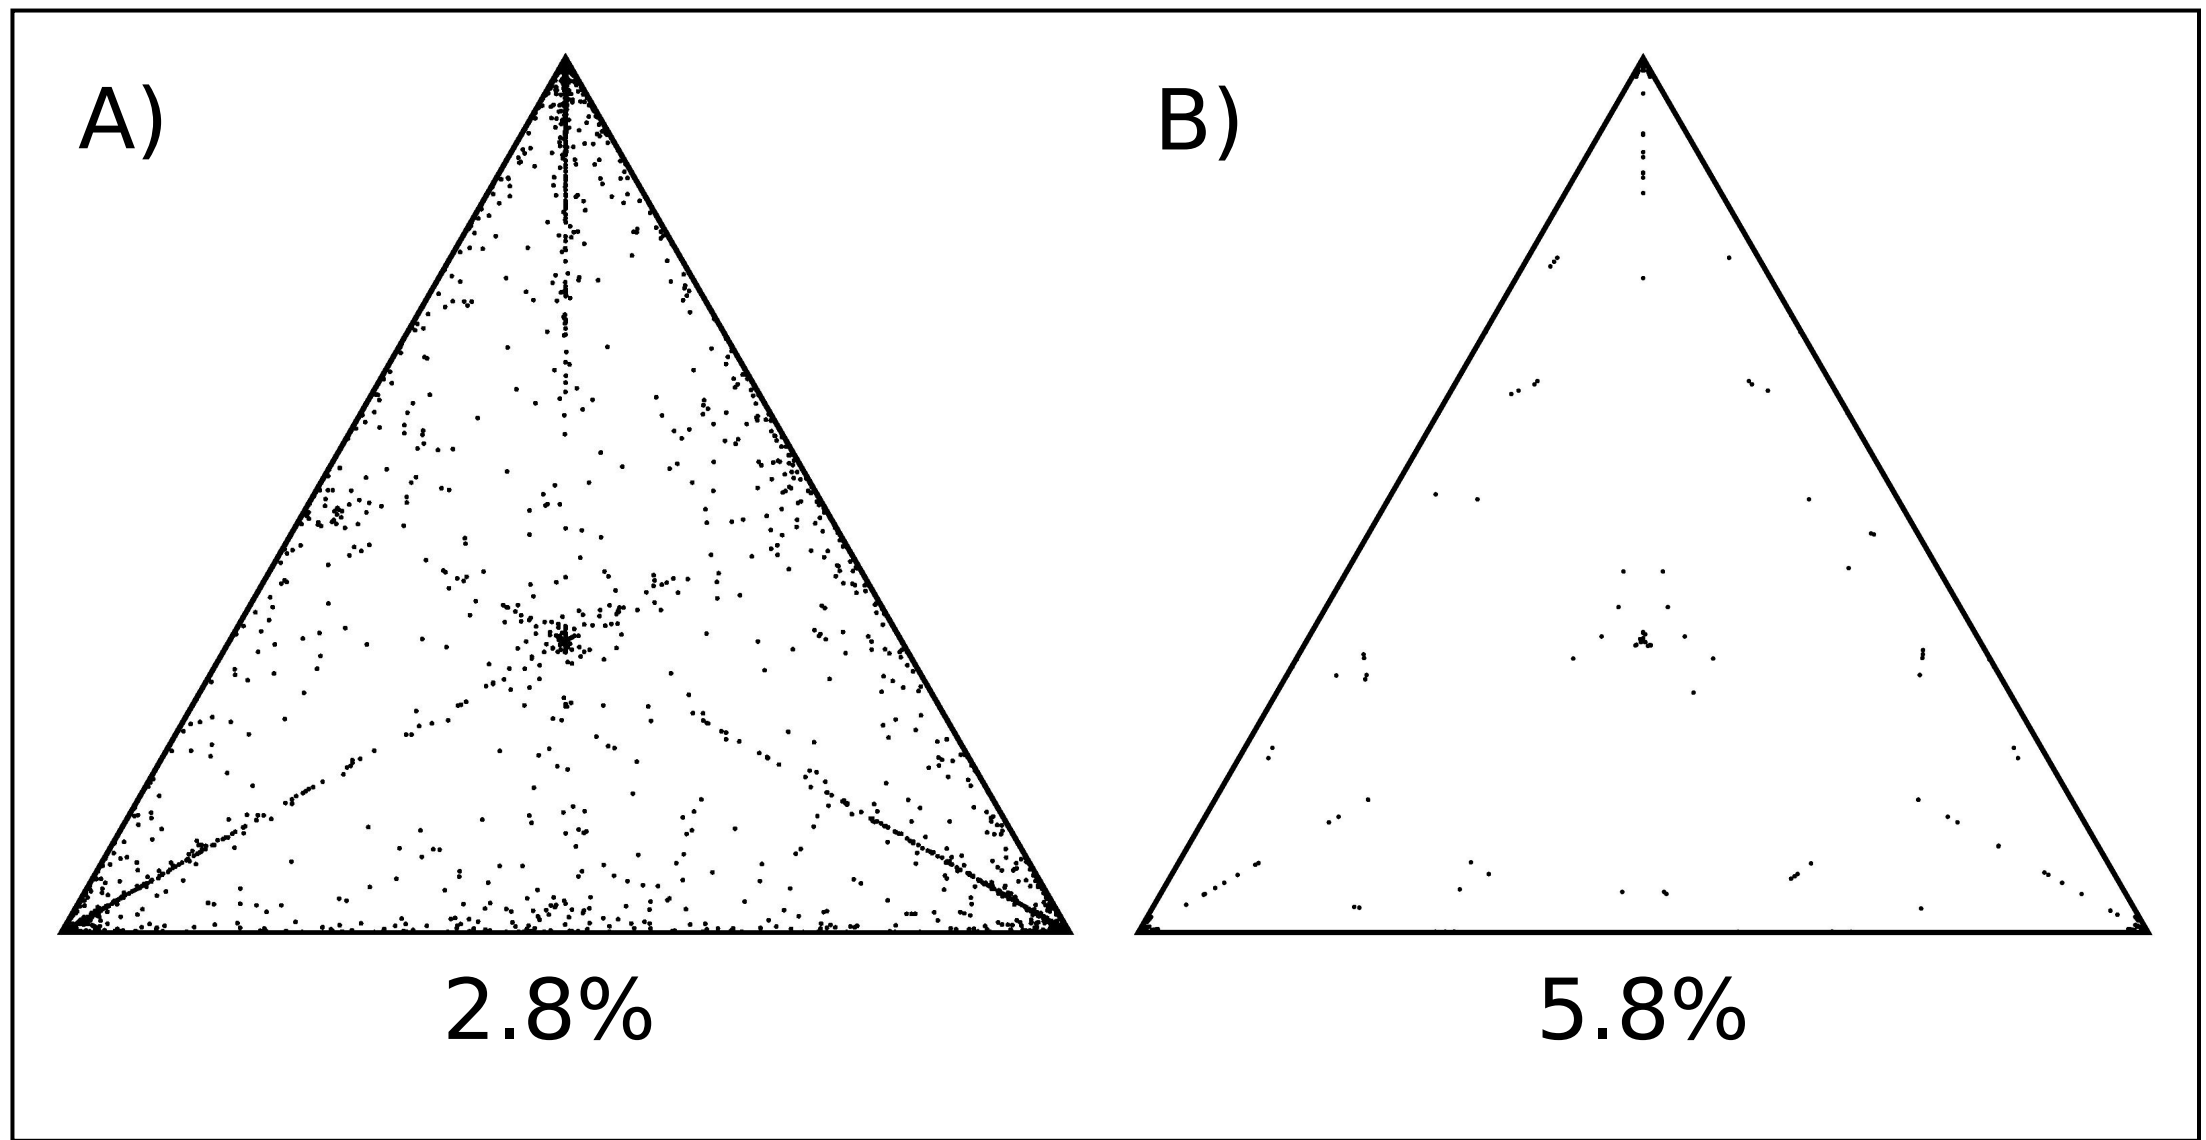

**Figure S2.** Likelihood map for the ORFV VIR global dataset. Likelihood map for the VIR global (A) and for the Sardinian VIR (B) datasets depicting the distribution of dots P, where P represents the likelihoods of the three possible unrooted trees for a set of four sequences [30-31]. Central area represents a star-like signal (phylogenetic noise). The value above the triangle represents the percentage of dots in the network-like area. A percentage lower than 20-30% indicates that the dataset is reliable for phylogenetic and taxonomic analyses with a good phylogenetic signal [30].
