# Supplementary material for: Molecular Insights into the Genetic Variability of ORF Virus in a Mediterranean Region (Sardinia, Italy)
Source: MDPI journal article supplement (doi:10.3390/life11050416), 2021-05-04
Supplement: s1 [file s1]

**Table S1. GenBank accession numbers.** List of GenBank accession numbers corresponding to the ORFV sequences obtained in the present study for the three genes analysed among Sardinian viral samples. Lesion severity is expressed in S (severe) and M (mild).

| <b>Sampling code</b> | <b>B2L</b> | <b>VIR</b> | <b>O45</b> | <b>Lesion severity</b> | <b>Host</b> |
|----------------------|------------|------------|------------|------------------------|-------------|
| ORF3_SS_2017         | MW043017   | MW043053   | MW043035   | S                      | Goat        |
| ORF4_SS_2017         | MW043018   | MW043054   | MW043036   | S                      | Goat        |
| ORF5_SS_2017         | MW043019   | MW043055   | MW043037   | S                      | Goat        |
| ORF10_SS_2019        | MW043021   | MW043057   | MW043039   | M                      | Goat        |
| ORF11_SS_2019        | MW043020   | MW043056   | MW043038   | M                      | Goat        |
| ORF12_SS_2019        | MW043022   | MW043058   | MW043040   | M                      | Goat        |
| ORF13_SS_2019        | MW043023   | MW043059   | MW043041   | M                      | Goat        |
| ORF14_SS_2019        | MW043024   | MW043060   | MW043042   | M                      | Goat        |
| ORF6_SS_2017         | MW043025   | MW043061   | MW043043   | M                      | Sheep       |
| ORF7_SS_2017         | MW043026   | MW043062   | MW043044   | M                      | Sheep       |
| ORF1_SS_2017         | MW043027   | MW043063   | MW043045   | S                      | Sheep       |
| ORF2_SS_2017         | MW043028   | MW043064   | MW043046   | S                      | Sheep       |
| ORF16_SS_2019        | MW043029   | MW043065   | MW043047   | M                      | Sheep       |
| ORF8_CA_2018         | MW043030   | MW043066   | MW043048   | S                      | Sheep       |
| ORF9_CA_2018         | MW043033   | MW043069   | MW043051   | S                      | Sheep       |
| ORF17_SS_2019        | MW043032   | MW043068   | MW043050   | M                      | Sheep       |
| ORF15_SS_2019        | MW043034   | MW043070   | MW043052   | M                      | Sheep       |
| ORF18_SS_2019        | MW043031   | MW043067   | MW043049   | M                      | Man         |
