# Supplementary material for: Molecular Insights into the Genetic Variability of ORF Virus in a Mediterranean Region (Sardinia, Italy)
Source: Life (Basel). 2021 May 4;11(5):416. doi: 10.3390/life11050416 (PMC8147818; doi:10.3390/life11050416)
Supplement: Supplementary file 1 [file life-11-00416-s001.zip]

Archive with 5 entries (5 files):
- English revision certificate.pdf
- Figure_S1.pdf
- Figure_S2.pdf
- Figure_S3.pdf
- Table_S1.pdf
